# Supplementary material
Source: ML conference proceedings conference paper supplement (https://proceedings.neurips.cc/paper_files/paper/2016/hash/b4568df26077653eeadf29596708c94b-Abstract.html)
Supplement: Supplementary file [file b4568df26077653eeadf29596708c94b-Supplemental.zip]

---

# Supplementary material: Minimax Optimal Alternating Minimization for Kernel Nonparametric Tensor Learning

---

**Taiji Suzuki\***, **Heishiro Kanagawa†**

\*,†Department of Mathematical and Computing Science, Tokyo Institute of Technology

\*PRESTO, Japan Science and Technology Agency

\*Center for Advanced Integrated Intelligence Research, RIKEN

s-taiji@is.titech.ac.jp, kanagawa.h.ab@m.titech.ac.jp

**Hayato Kobayash, Nobuyuki Shimizu, Yukihiro Tagami**

Yahoo Japan Corporation,

hakobaya@yahoo-corp.jp, nobushim@yahoo-corp.jp, yutagami@yahoo-corp.jp

In this supplementary material, we give the comprehensive proof of the theorems in the main text and give more detailed and precise statements of the theorems.

## A Proof of linear convergence of the alternating minimization procedure

Suppose that we have got an estimator  $\tilde{f} = (\tilde{f}_{(r,k)})_{r,k}$ ,  $\tilde{v} = (\tilde{v}_r)_r$  and now we are updating the  $(r, k)$ -th element as  $\tilde{f}'_{(r,k)} \leftarrow \tilde{f}_{(r,k)}$  and  $\tilde{v}'_r \leftarrow \tilde{v}_r$ .

### A.1 Convergence analysis

Let  $\{\hat{f}_{(r',k')}\}_{r',k'}$  be any functions such that  $\prod_{k'=1}^K \hat{f}_{(r',k')} = \tilde{v}_{r'} \prod_{k'=1}^K \tilde{f}_{(r',k')}$ , and, as a particular choice of such functions, we set  $\hat{f}_{(r',k')} = \tilde{f}_{(r',k')}$  ( $\forall k' \neq k, \forall r' \in [d]$ ) and  $\hat{f}_{(r',k)} = \tilde{v}_{r'} \tilde{f}_{(r',k)}$  ( $\forall r' \neq r$ ). Let  $\bar{f}_{(r',k')} = \tilde{f}_{(r',k')} / \|\tilde{f}_{(r',k')}\|_{L_2} = \hat{f}_{(r',k')} / \|\hat{f}_{(r',k')}\|_{L_2}$  ( $\forall (r', k') \in [d] \times [K]$ ) and  $\bar{v}_{r'} = \prod_{k'=1}^K \|\hat{f}_{(r',k')}\|_{L_2} = \tilde{v}_{r'} \prod_{k'=1}^K \|\tilde{f}_{(r',k')}\|_{L_2}$  ( $\forall r' \in [d]$ ). The newly updated  $(r, k)$ -th element is denoted by  $\tilde{f}'_{(r,k)}$  (see Eq. (4)) and we denote by  $\bar{v}'_r$  the updated value of  $\bar{v}_r$  correspondingly:  $\bar{v}'_r = \|\tilde{f}'_{(r,k)}\|_{L_2} \prod_{k' \neq k} \|\tilde{f}_{(r,k')}\|_{L_2}$ . We also denote by  $\bar{f}'_{(r,k)} = \tilde{f}'_{(r,k)} / \|\tilde{f}'_{(r,k)}\|_{L_2}$ .

For the simplicity of the notation, we denote by  $f_r := \prod_{k=1}^K f_{(r,k)}$ . Similarly, we use notations like  $f_r^*$ ,  $\hat{f}_r$ ,  $\tilde{f}_r$  to express the  $r$ -th component.

Define  $Pf = \int f(X) dP_{\mathcal{X}}(X)$  and  $P_n f := \frac{1}{n} \sum_{i=1}^n f(x_i)$  for a function  $f : \mathcal{X} \rightarrow \mathbb{R}$ . For the estimator  $\hat{f} = \{\hat{f}_{(r,k)}\}_{r,k}$ , define

$$d_{\infty}(\hat{f}) := \max_{(r',k')} \{v_{r'} \|\bar{f}_{(r',k')} - f_{(r',k')}^{**}\|_{L_2} + |v_{r'} - \bar{v}_{r'}|\},$$

where  $\bar{f}$  and  $\bar{v}$  are Note that  $d_{\infty}(\hat{f})$  is uniquely defined by  $\hat{f}$ . This is equivalent to  $d_{\infty}(\tilde{f}, \tilde{v})$  in the main text, but we employ the above notation because of the notational simplicity.

For  $\lambda_{1,n} > 0$  and  $\lambda_{2,n} > 0$ , we define

$$\zeta_n = \zeta_n(\lambda_{1,n}) = \max\{C_s, \tilde{C}_s\} \left( \frac{K^{\frac{1+2s}{2}} \lambda_{1,n}^{-\frac{s}{2}}}{\sqrt{n}} \vee \frac{K^{\frac{1+2s}{1+s}}}{\lambda_{1,n}^{\frac{2s+(1-s)s_2}{2(1+s)}} n^{\frac{1}{1+s}}} \right),$$

$$\zeta'_n = \zeta'_n(\lambda_{2,n}) = C'_s \left( \frac{\lambda_{2,n}^{-\frac{s}{2}}}{\sqrt{n}} \vee \frac{1}{\lambda_{2,n}^{\frac{1}{2}} n^{\frac{1}{1+s}}} \right)$$

where  $C_s, \tilde{C}_s, C'_s$  are constants depending on  $s, s_2, c, c_2$  that will be given in Lemma A.9, Lemma A.11 and Lemma A.15 respectively.

Let  $\mathcal{T}_r := \{f - g \mid f = \prod_{k=1}^K f_k, g = \prod_{k=1}^K g_k \text{ where } f_k, g_k \in \mathcal{H}_{r,k}, \|f_k\|_{\mathcal{H}_{r,k}} \leq 1, \|g_k\|_{\mathcal{H}_{r,k}} \leq 1 (k \in [K])\}$ , and  $\mathcal{T}'_{r,k} = \{(f_{(r,k)}(x) - f'_{(r,k)}(x)) \prod_{k' \neq k} f_{(r,k')}^{**}(x) \mid f_{(r,k)}, f'_{(r,k)} \in \mathcal{H}_{r,k}, \|f_{(r,k)}\|_{\mathcal{H}_{r,k}} \leq 1, \|f'_{(r,k)}\|_{\mathcal{H}_{r,k}} \leq 1\}$ . Then Corollary A.13 and Lemma A.16 yield that there exist universal constants  $C$  and  $\tilde{C}$  such that

$$\max_{r,r'} \sup_{f \in \mathcal{T}_r, f' \in \mathcal{T}'_{r'}} \left| (P - P_n) \left( \frac{ff'}{\|ff'\|_{L_2} + \lambda_{1,n}^{\frac{1}{2}}} \right) \right| \leq C \log(d) \zeta_n \max\{1, \tau\} \quad (\text{S-1})$$

holds with probability  $1 - \exp(-\tau)$  for all  $\tau > 0$ , and all of the following inequalities are simultaneously satisfied with probability  $1 - \exp(-\tau)$  for all  $\tau > 0$ :

$$\max_{1 \leq r \leq d, 1 \leq k \leq K} \sup_{f \in \mathcal{T}'_{r,k}} \left| (P - P_n) \left( \frac{f^2}{\|f^2\|_{L_2} + \lambda_{2,n}^{\frac{1}{2}}} \right) \right| \leq \tilde{C} \log(dK) \zeta'_n \max\{1, \tau\}, \quad (\text{S-2a})$$

$$\max_{1 \leq r \leq d, 1 \leq k \leq K} \sup_{f \in \mathcal{T}'_{r,k}} \left| \frac{1}{n} \sum_{i=1}^n \left( \frac{\epsilon_i f(x_i)}{\|f\|_{L_2} + \lambda_{2,n}^{\frac{1}{2}}} \right) \right| \leq \tilde{C} L \log(dK) \zeta'_n \max\{1, \tau\}, \quad (\text{S-2b})$$

$$\max_{1 \leq r \leq d, 1 \leq k \leq K} \sup_{f \in \mathcal{H}_{r,k}, \|f\|_{\mathcal{H}_{r,k}} \leq 1} \left| (P - P_n) \left( \frac{f^2}{\|f\|_{L_2} + \lambda_{2,n}^{\frac{1}{2}}} \right) \right| \leq \tilde{C} \log(dK) \zeta'_n \max\{1, \tau\}. \quad (\text{S-2c})$$

Let  $\tilde{\mathcal{T}}_{r,k} = \{(f_{(r,k)} - f'_{(r,k)}) (\prod_{k' \neq k} f_{(r,k')} - \prod_{k' \neq k} f'_{(r,k')}) \mid f_{(r,k')}, f'_{(r,k')} \in \mathcal{H}_{r,k'}, \|f_{(r,k')}\|_{\mathcal{H}_{r,k'}} \leq 1, \|f'_{(r,k')}\|_{\mathcal{H}_{r,k'}} \leq 1 (k' \in [K])\}$ . Then Lemma A.14 indicates that there exists a universal constant  $\tilde{C}' > 0$  such that, for any  $0 < \lambda$ , all of the following two inequalities simultaneously hold with probability  $1 - \exp(-\tau)$ :

$$\max_{1 \leq r \leq d, 1 \leq k \leq K} \sup_{f \in \tilde{\mathcal{T}}_{r,k}} \left| \frac{1}{n} \sum_{i=1}^n \left( \frac{\epsilon_i f(x_i)}{\|f\|_{L_2} + \lambda_{1,n}^{\frac{1}{2}}} \right) \right| \leq \tilde{C}' L \log(dK) \zeta_n \max\{1, \tau\}, \quad (\text{S-3a})$$

$$\max_{1 \leq r \leq d, 1 \leq k \leq K} \sup_{f, f' \in \tilde{\mathcal{T}}_{r,k}} \left| (P - P_n) \left( \frac{ff'}{\|ff'\|_{L_2} + \lambda_{1,n}^{\frac{1}{2}}} \right) \right| \leq \tilde{C}' \log(dK) \zeta_n \max\{1, \tau\}. \quad (\text{S-3b})$$

We define an event  $\mathcal{E}_1$  so that all inequalities in Eq. (S-1), Eq. (S-2) and Eq. (S-3) are satisfied. Then  $P(\mathcal{E}_1) \geq 1 - 3 \exp(-\tau)$  by the argument given above. Based on  $\zeta_n(\lambda_{1,n})$  and  $\zeta'_n(\lambda_{2,n})$ , define

$$\xi_n = \xi_n(\lambda_{1,n}, \tau) := \max\{C, \tilde{C}, \tilde{C}' L\} \log(dK) \zeta_n(\lambda_{1,n}) \max\{1, \tau\},$$

and

$$\xi'_n = \xi'_n(\lambda_{2,n}, \tau) := \tilde{C} \max\{1, L\} \log(dK) \zeta'_n(\lambda_{2,n}) \max\{1, \tau\}.$$

Let  $\tilde{R} = 2R$  and  $\hat{R} = 8\tilde{R} / \min\{v_{\min}, 1\}$ . The following theorem is a detailed version of Theorem 2 in the main text.

**Theorem A.1.** *Suppose that Assumptions 1–4 are satisfied. We also assume the the following conditions.*

- $d_\infty(\hat{f})$  and  $\mu^*$  are sufficiently small so that there exists  $\mu > 0$  such that

$$1 > \mu \geq 2 \frac{d_\infty(\hat{f})}{v_{\min}} + \mu^*. \quad (\text{S-4})$$

Correspondingly, we define

$$c_\mu = (d-1) \left( \frac{4}{3}K + \mu \right) \left( \frac{3}{2} \right)^{K-1} \mu^{K-2}. \quad (\text{S-5})$$

- Let

$$Q_n = \frac{2K(1+2\hat{R}^K)\xi_n}{v_{\min}} + 3(d-1)(K-1)\xi_n\hat{R}^K + 4K\hat{R}^K\xi_n + c_\mu + \frac{4\hat{R}K^2}{v_{\min}^2}d_\infty(\hat{f}) + \sqrt{\frac{1-s_2}{8}}.$$

and

$$S_n = 4\xi'_n\lambda_{2,n}^{1/2} + (d+2)\xi_n\lambda_{1,n}^{1/2} + 12\xi_n'^2 + s_2 \frac{48^{1/s_2}}{8} [(d-1)c_2]^{2/s_2} (1+2v_{\max})^2 \hat{R}^{2(K-1)(1-s_2)/s_2} \xi_n'^{2/s_2}.$$

- $n$  is sufficiently large so that

$$\xi'_n \hat{R}^2 (1 + \lambda_{2,n}^{1/2}) \leq \frac{2^{\frac{1}{K}} - 1}{2^{1+\frac{1}{K}} - 1}.$$

- The RKHS-norms of the functions  $\{\bar{f}_{(r',k')}\}$  are bounded as

$$\|\bar{f}_{(r',k')}\|_{\mathcal{H}_{r',k'}} \leq \frac{1}{2} \hat{R} \quad (\forall (r',k') \neq (r,k)). \quad (\text{S-6})$$

Then, in the event  $\mathcal{E}_1$ , we have that

$$\left( v_r \|\bar{f}'_{(r,k)} - f_{(r,k)}^{**}\|_{L_2} + |\bar{v}'_r - v_r| \right)^2 \leq 27Q_n^2 d_\infty(\hat{f})^2 + 18S_n \hat{R}^{2K}.$$

In particular, for a sufficiently large  $n$  and small  $c_\mu$  such that  $Q_n^2 \leq 1/54$ , we have

$$\left( v_r \|\bar{f}'_{(r,k)} - f_{(r,k)}^{**}\|_{L_2} + |\bar{v}'_r - v_r| \right)^2 \leq \frac{1}{2} d_\infty(\hat{f})^2 + 18S_n \hat{R}^{2K}.$$

Moreover, if we denote by  $\eta_n$  the right hand side of the above inequality, then it holds that

$$\|\bar{f}'_{(r,k)}\|_{\mathcal{H}_{r,k}} \leq \frac{2}{v_r - \sqrt{\eta_n}} \hat{R}.$$

This theorem immediately gives the following corollary.

**Corollary A.2.** Let  $\hat{f}_{[t]}$  be the estimator after the  $t$ -th iteration. Suppose that  $d_\infty(\hat{f}_{[1]})$  satisfies the assumptions of Theorem A.1,  $Q_n^2 \leq 1/54$ ,  $d_\infty(\hat{f}_{[1]})^2 \leq v_{\min}^2/8$  and  $18S_n \hat{R}^{2K} \leq v_{\min}^2/8$ . Then it holds that

$$d_\infty(\hat{f}_{[t+1]})^2 \leq \max \left\{ \left( \frac{3}{4} \right)^t d_\infty(\hat{f}_{[1]})^2, 54S_n \hat{R}^{2K} \right\}$$

for all  $t = 2, 3, \dots$  in the event  $\mathcal{E}_1$ .

By substituting  $\lambda_{1,n} = K^{-\frac{1+s}{1-s}} d^{-\frac{2}{1-s}} n^{-\frac{1}{1+s}}$  and  $\lambda_{2,n} = n^{-\frac{1}{1+s}}$ , we have that

$$S_n = O \left( n^{-\frac{1}{1+s}} \vee \left( n^{-\frac{1}{1+s} - (1-s_2) \min\{\frac{1-s}{4(1+s)}, \frac{1}{s_2(1+s)}\}} \text{poly}(d, K) \right) \right)$$

Thus, for  $s_2 < 1$ , we have  $S_n \leq Cn^{-\frac{1}{1+s}}$  for sufficiently large  $n$  with a constant  $C$ . Since Lemma A.5 states that  $\{\bar{f}_{(r,k)}\}_{r,k}$  are  $\mu$ -incoherent under the assumptions of Theorem A.1, thus Lemma A.7 gives that

$$\|\hat{f} - f^*\|_{L_2}^2 \leq dK d_\infty(\hat{f})^2 + \frac{dK^2}{v_{\min}^2} d_\infty(\hat{f})^4 + d^2 K^2 \mu d_\infty(\hat{f})^2.$$

By applying this inequality to  $\hat{f} = \hat{f}_{[t]}$ , we obtain the following theorem.

**Theorem A.3.** In addition to the conditions in Corollary A.2, if  $d_\infty(\hat{f}_{[1]}) \leq 1/\sqrt{K}$  and  $\mu \leq 1/(dK)$ , then we have

$$\|\hat{f}_{[t]} - f^*\|^2 = O\left(dKn^{-\frac{1}{1+s}} \log(dK) + dK(3/4)^t\right),$$

for sufficiently large  $n$  and all  $t = 2, 3, \dots$  with probability  $1 - 3\exp(-\tau)$ .

This means that after  $T \geq \frac{1}{\nu} \log(n)$  iterations, we obtain the estimation accuracy  $O(dKn^{-\frac{1}{1+s}})$ . This computational complexity is quite advantageous. The estimation accuracy is  $d \times K$  times the optimal rate  $n^{-\frac{1}{1+s}}$  to estimate one function  $f_{(r,k)}^*$ . This is intuitively natural because we are estimating  $d \times K$  functions  $\{f_{(r,k)}^*\}_{r,k}$ . Indeed, it has been shown that this accuracy bound is minimax optimal.

*Proof.* (Theorem A.1) Throughout the proof, we fix  $(r, k)$ . There is a freedom of the scaling factor to define  $f_{(r,k')}^*$  ( $k' = 1, \dots, K$ ). Thus, we may set the scaling factor of  $f^*$  as

$$f_{(r,k')}^* = f_{(r,k')}^{**} \|\tilde{f}_{(r,k')}\|_{L_2} \text{ for } k' \neq k, \quad f_{(r,k)}^* = v_r f_{(r,k)}^{**} / \prod_{k' \neq k} \|\tilde{f}_{(r,k')}\|_{L_2}.$$

Note that  $f_r^* = \prod_{k'=1}^K f_{(r,k')}^* = v_r \prod_{k'=1}^K f_{(r,k')}^{**}$ .

Since  $\|\tilde{f}_{(r,k')}\|_n = 1$ , the  $L_2$ -norm of  $\|\tilde{f}_{(r,k')}\|_{L_2}$  is evaluated as

$$\|\tilde{f}_{(r,k')}\|_{L_2} = \|\tilde{f}_{(r,k')}\|_{L_2} / \|\tilde{f}_{(r,k')}\|_n = \|\tilde{f}_{(r,k')}\|_{L_2} / \|\tilde{f}_{(r,k')}\|_n = 1 / \|\tilde{f}_{(r,k')}\|_n. \quad (\text{S-7})$$

By the assumption (S-6) that  $\|\tilde{f}_{(r,k')}\|_{\mathcal{H}_{r,k'}} \leq \hat{R}$  ( $k' \neq k$ ), Eq. (S-2c) gives that

$$|\|\tilde{f}_{(r,k')}\|_n^2 - \|\tilde{f}_{(r,k')}\|_{L_2}^2| \leq \xi_n' \hat{R}^2 (1 + \lambda_{2,n}^{1/2}).$$

By the definition of  $\tilde{f}_{(r,k')}$ , we have  $\|\tilde{f}_{(r,k')}\|_{L_2} = 1$ . Therefore,  $|\|\tilde{f}_{(r,k')}\|_n^2 - 1| \leq \xi_n' \hat{R}^2 (1 + \lambda_{2,n}^{1/2})$ . Then, by the assumption that  $\xi_n' \hat{R}^2 (1 + \lambda_{2,n}^{1/2}) \leq \frac{2^{\frac{1}{K}-1}}{2^{1+\frac{1}{K}}-1}$ , we have

$$2^{-1/K} \leq \frac{1}{\|\tilde{f}_{(r,k')}\|_n^2} \leq 2^{1/K}. \quad (\text{S-8})$$

This and Eq. (S-7) give that  $2^{-1/K} \leq \|\tilde{f}_{(r,k')}\|_{L_2} \leq 2^{1/K}$  for  $k' \neq k$ , and concludes that

$$1/2 \leq \prod_{k' \neq k} \|\tilde{f}_{(r,k')}\|_{L_2} \leq 2.$$

Therefore, by the assumption (A1-2), we have that

$$\|f_{(r,k)}^*\|_{\mathcal{H}_{r,k}} = \frac{v_r \|f_{(r,k)}^{**}\|_{\mathcal{H}_{r,k}}}{\prod_{k' \neq k} \|\tilde{f}_{(r,k')}\|_{L_2}} \leq 2R = \tilde{R}. \quad (\text{S-9})$$

Moreover, by the assumption Eq. (S-6), we have that, for all  $k' \neq k$ ,

$$\|\tilde{f}_{(r,k')}\|_{\mathcal{H}_{r,k'}} = \frac{\|\tilde{f}_{(r,k')}\|_{\mathcal{H}_{r,k'}}}{\|\tilde{f}_{(r,k')}\|_n} \leq \frac{2^{1/K}}{2} \hat{R} \leq \hat{R}. \quad (\text{S-10})$$

We denote by  $F(f)$  the objective function of the optimization problem (4) for the update of  $\tilde{f}'_{(r,k)}$  on fixed  $(r, k)$ . Then by the optimality condition, for the Fréchet derivative  $\nabla F(\tilde{f}'_{(r,k)})$  in the RKHS  $\mathcal{H}_{r,k}$ , it holds that  $\langle \nabla F(\tilde{f}'_{(r,k)}), \tilde{f}'_{(r,k)} - f_{(r,k)}^* \rangle_{\mathcal{H}_{r,k}} \leq 0$ . That is,

$$\begin{aligned} & \frac{1}{n} \sum_{i=1}^n \left( \tilde{f}'_{(r,k)}(x_i) \prod_{k' \neq k} \tilde{f}_{(r,k')}(x_i) + \sum_{r' \neq r} \tilde{v}_{r'} \tilde{f}_{r'}(x_i) - y_i \right) \prod_{k' \neq k} \tilde{f}_{(r,k')}(x_i) (\tilde{f}'_{(r,k)}(x_i) - f_{(r,k)}^*(x_i)) \\ & \leq 0, \end{aligned} \quad (\text{S-11})$$

where we used that  $f_{(r,k)}^*$  is in the feasible set because  $\|f_{(r,k)}^*\|_{\mathcal{H}_{r,k}} \leq \tilde{R}$  (see Eq. (S-9)). By using the relation  $y_i = f^*(x_i) + \epsilon_i$  and arranging the terms in Eq. (S-11), we obtain that

$$\begin{aligned} & P_n \left[ (\tilde{f}'_{(r,k)} - f_{(r,k)}^*)^2 \left( \prod_{k' \neq k} \tilde{f}_{(r,k')} \right)^2 \right] \\ & \leq \frac{1}{n} \sum_{i=1}^n \epsilon_i \prod_{k' \neq k} \tilde{f}_{(r,k')}(x_i) (\tilde{f}'_{(r,k)}(x_i) - f_{(r,k)}^*(x_i)) \\ & - P_n \left[ \left( \sum_{r' \neq r} (\hat{f}_{r'} - f_{r'}^*) + f_{(r,k)}^* \left( \prod_{k' \neq k} \tilde{f}_{(r,k')} - \prod_{k' \neq k} f_{(r,k')}^* \right) \right) \prod_{k' \neq k} \tilde{f}_{(r,k')} (\tilde{f}'_{(r,k)} - f_{(r,k)}^*) \right]. \end{aligned} \quad (\text{S-12})$$

Now, let  $\tilde{g} := \prod_{k' \neq k} \tilde{f}_{(r,k')} (\tilde{f}'_{(r,k)} - f_{(r,k)}^*)$ , and define  $E_1$  to  $E_6$  as

$$\begin{aligned} E_1 &:= (P - P_n)(\tilde{g}^2), \quad E_2 := \frac{1}{n} \sum_{i=1}^n \epsilon_i \tilde{g}(x_i), \\ E_3 &= (P - P_n) \left[ \left( \sum_{r' \neq r} (\hat{f}_{r'} - f_{r'}^*) \right) \tilde{g} \right], \quad E_4 := (P - P_n) \left[ f_{(r,k)}^* \left( \prod_{k' \neq k} \tilde{f}_{(r,k')} - \prod_{k' \neq k} f_{(r,k')}^* \right) \tilde{g} \right], \\ E_5 &= -P \left[ \sum_{r' \neq r} (\tilde{f}_{r'} - f_{r'}^*) \tilde{g} \right], \quad E_6 := -P \left[ f_{(r,k)}^* \left( \prod_{k' \neq k} \tilde{f}_{(r,k)} - \prod_{k' \neq k} f_{(r,k)}^* \right) \tilde{g} \right]. \end{aligned}$$

Then, we can easily see that Eq. (S-12) gives

$$P(\tilde{g}^2) \leq \sum_{j=1}^6 E_j \leq |E_1| + |E_2| + |E_3| + |E_4| + |E_5| + |E_6|.$$

From now on, we are going to bound each term  $E_j$  ( $j = 1, \dots, 6$ ).

(1) (Bounding  $E_1$  and  $E_2$ ) Since  $\|\tilde{f}_{(r,k')}\|_{\mathcal{H}_{r,k'}} \leq \hat{R}$  ( $\forall k' \neq k$ ) (Eq. (S-10)),  $\|f_{(r,k)}^*\|_{\mathcal{H}_{r,k}} \leq \hat{R}$  (Eq. (S-9)),  $\|\tilde{f}'_{(r,k)}\|_{\mathcal{H}_{r,k}} \leq \hat{R}$  by the construction, Lemma A.4 gives upper bounds of  $|E_1|$  and  $|E_2|$  as

$$\begin{aligned} |E_1| &\leq 2\hat{R}^K \xi'_n (\|\tilde{g}\|_{L_2} + \lambda_{2,n}^{1/2} \hat{R}^K) + \hat{R}^K \xi_n (2K \|\tilde{g}\|_{L_2} d_\infty(\hat{f})/v_{\min} + \lambda_{1,n}^{1/2} \hat{R}^K), \\ |E_2| &\leq 2\xi'_n (\|\tilde{g}\|_{L_2} + \lambda_{2,n}^{1/2} \hat{R}^K) + \xi_n (2K \|\tilde{g}\|_{L_2} d_\infty(\hat{f})/v_{\min} + \lambda_{1,n}^{1/2} \hat{R}^K). \end{aligned}$$

(3) (Bounding  $E_3$ ) Eq. (S-1) gives an upper bound of  $E_3$  as

$$|E_3| \leq \sum_{r' \neq r} |(P - P_n)[(\hat{f}_{r'} - f_{r'}^*) \tilde{g}]| \leq \sum_{r' \neq r} \xi_n (\|\hat{f}_{r'} - f_{r'}^*\|_{L_2} + \lambda_{1,n}^{1/2} \hat{R}^{2K}).$$

Now we evaluate the term  $\|(\hat{f}_{r'} - f_{r'}^*) \tilde{g}\|_{L_2}$ . By a slight abuse of notation, we change the scaling of  $\tilde{f}$  as  $\tilde{f}_{(r',k')} = \tilde{f}_{(r',k')} (\forall k' \neq k, r' \neq r)$  and  $\tilde{f}_{(r',k)} = \|\hat{f}_{r'}\|_{L_2} \tilde{f}_{(r',k)} = \bar{v}_{r'} \tilde{f}_{(r',k)} (\forall r' \neq r)$ , in particular,  $\hat{f}_{r'} = \prod_{k'=1}^K \tilde{f}_{(r',k')}$ . Similarly, we set  $f_{(r',k')}^* = f_{(r',k')}^{**} (\forall k' \neq k, r' \neq r)$  and  $f_{(r',k)}^* = v_{r'} f_{(r',k)}^{**} (\forall r' \neq r)$ . Then, by the assumption (S-6), it holds that

$$\|\tilde{f}_{(r',k)}\|_{\mathcal{H}_{r',k}} = \bar{v}_{r'} \|\tilde{f}_{(r',k)}\|_{\mathcal{H}_{r',k}} \leq \bar{v}_{r'} \frac{\hat{R}}{2} \leq (v_{r'} + d_\infty(\hat{f})) \frac{\hat{R}}{2}. \quad (\text{S-13})$$

Hence, the term  $\|(\hat{f}_{r'} - f_{r'}^*) \tilde{g}\|_{L_2}$  is bounded as

$$\|(\hat{f}_{r'} - f_{r'}^*) \tilde{g}\|_{L_2}^2 = P[(\hat{f}_{r'} - f_{r'}^*)^2 \tilde{g}^2]$$

$$\begin{aligned}
&= P \left\{ \left[ (\tilde{f}_{(r',k)} - f_{(r',k)}^*) \prod_{k' \neq k} f_{(r',k')}^* + \tilde{f}_{(r',k)} (\prod_{k' \neq k} \tilde{f}_{(r',k')} - \prod_{k' \neq k} f_{(r',k')}^*) \right]^2 (\tilde{f}_{(r,k)}' - f_{(r,k)}^*)^2 (\prod_{k' \neq k} \tilde{f}_{(r,k')}^2) \right\} \\
&\leq 2P \left\{ (\tilde{f}_{(r',k)} - f_{(r',k)}^*)^2 (\prod_{k' \neq k} f_{(r',k')}^*)^2 (\tilde{f}_{(r,k)}' - f_{(r,k)}^*)^2 (\prod_{k' \neq k} \tilde{f}_{(r,k')}^2) \right. \\
&\quad \left. + \tilde{f}_{(r',k)}^2 (\prod_{k' \neq k} \tilde{f}_{(r',k')} - \prod_{k' \neq k} f_{(r',k')}^*)^2 (\tilde{f}_{(r,k)}' - f_{(r,k)}^*)^2 (\prod_{k' \neq k} \tilde{f}_{(r,k')}^2) \right\} \\
&\stackrel{(a)}{\leq} 2 \|\tilde{f}_{(r',k)} - f_{(r',k)}^*\|_\infty^2 P[\tilde{g}^2 (\prod_{k' \neq k} f_{(r',k')}^*)^2] + 4\bar{v}_{r'}^2 \hat{R}^{2K} P(\tilde{g}^2) \|\prod_{k' \neq k} \tilde{f}_{(r',k')} - \prod_{k' \neq k} f_{(r',k')}^*\|_{L_2}^2 \\
&\stackrel{(b)}{\leq} 2 \|\tilde{f}_{(r',k)} - f_{(r',k)}^*\|_\infty^2 P[\tilde{g}^2 (\prod_{k' \neq k} f_{(r',k')}^*)^2] + 4\hat{R}^{2K} P(\tilde{g}^2) \bar{v}_{r'}^2 \left( \sum_{k' \neq k} \|\tilde{f}_{(r',k')} - f_{(r',k')}^*\|_{L_2} \right)^2 \\
&\stackrel{(c)}{\leq} 2 \|\tilde{f}_{(r',k)} - f_{(r',k)}^*\|_\infty^2 P[\tilde{g}^2 (\prod_{k' \neq k} f_{(r',k')}^*)^2] + 4\hat{R}^{2K} P(\tilde{g}^2) [2(K-1)d_\infty(\hat{f})]^2,
\end{aligned}$$

where the inequalities (a), (b) and (c) are shown as follows: (a) first, we notice that  $\|\tilde{f}_{(r',k)}\|_\infty \leq \|\tilde{f}_{(r',k)}\|_{\mathcal{H}_{r',k}} = \bar{v}_{r'} \|\tilde{f}_{(r',k)}\|_{\mathcal{H}_{r',k}} \leq \bar{v}_{r'} \hat{R}$  by the assumption (S-6),  $\|\tilde{f}_{(r,k)}'\|_\infty \leq \|\tilde{f}_{(r,k)}'\|_{\mathcal{H}_{r,k}} \leq \hat{R}$  by Eq. (S-10), and then we obtain

$$\begin{aligned}
&P \left\{ \tilde{f}_{(r',k)}^2 (\prod_{k' \neq k} \tilde{f}_{(r',k')} - \prod_{k' \neq k} f_{(r',k')}^*)^2 (\tilde{f}_{(r,k)}' - f_{(r,k)}^*)^2 (\prod_{k' \neq k} \tilde{f}_{(r,k')}^2) \right\} \\
&\leq \|\tilde{f}_{(r',k)}\|_\infty^2 \prod_{k' \neq k} \|\tilde{f}_{(r,k')}\|_\infty^2 P \left[ (\tilde{f}_{(r,k)}' - f_{(r,k)}^*)^2 \right] P \left[ (\prod_{k' \neq k} \tilde{f}_{(r',k')} - \prod_{k' \neq k} f_{(r',k')}^*)^2 \right] \\
&\leq \bar{v}_{r'}^2 \hat{R}^{2K} P \left[ (\tilde{f}_{(r,k)}' - f_{(r,k)}^*)^2 \prod_{k' \neq k} \tilde{f}_{(r,k')}^2 \right] \frac{1}{P(\prod_{k' \neq k} \tilde{f}_{(r,k')}^2)} P \left[ (\prod_{k' \neq k} \tilde{f}_{(r',k')} - \prod_{k' \neq k} f_{(r',k')}^*)^2 \right] \\
&\leq \bar{v}_{r'}^2 \hat{R}^{2K} \|\tilde{g}\|_{L_2}^2 P \left[ (\prod_{k' \neq k} \tilde{f}_{(r',k')} - \prod_{k' \neq k} f_{(r',k')}^*)^2 \right].
\end{aligned}$$

(b) is shown by the equalities  $\|\tilde{f}_{(r',k')}\|_{L_2} = \|f_{(r',k')}^*\|_{L_2} = 1$  and  $\bar{v}_{r'} = \|\tilde{f}_{(r',k)}\|_{L_2}$ . (c) is shown as  $\bar{v}_{r'} \|\tilde{f}_{(r',k')} - f_{(r',k')}^*\|_{L_2} = v_{r'} \|\tilde{f}_{(r',k')} - f_{(r',k')}^*\|_{L_2} + |\bar{v}_{r'} - v_{r'}| \|\tilde{f}_{(r',k')} - f_{(r',k')}^*\|_{L_2} \leq 2(v_{r'} \|\tilde{f}_{(r',k')} - f_{(r',k')}^*\|_{L_2} + |\bar{v}_{r'} - v_{r'}|) \leq 2d_\infty(\hat{f})$ . Here, by Assumption 3 and Eq. (S-13), we have

$$\begin{aligned}
&\|\tilde{f}_{(r',k)} - f_{(r',k)}^*\|_\infty \\
&\leq c_2 \|\tilde{f}_{(r',k)} - f_{(r',k)}^*\|_{L_2}^{1-s_2} \|\tilde{f}_{(r',k)} - f_{(r',k)}^*\|_{\mathcal{H}_{r',k}}^{s_2} \\
&\leq c_2 (\|\tilde{f}_{(r',k)} - v_{r'} \tilde{f}_{(r',k)}\|_{L_2} + \|v_{r'} \tilde{f}_{(r',k)} - f_{(r',k)}^*\|_{L_2})^{1-s_2} \|\tilde{f}_{(r',k)} - f_{(r',k)}^*\|_{\mathcal{H}_{r',k}}^{s_2} \\
&= c_2 (|\bar{v}_{r'} - v_{r'}| \|\tilde{f}_{(r',k)}\|_{L_2} + v_{r'} \|\tilde{f}_{(r',k)} - f_{(r',k)}^*\|_{L_2})^{1-s_2} \|\tilde{f}_{(r',k)} - f_{(r',k)}^*\|_{\mathcal{H}_{r',k}}^{s_2} \\
&\leq c_2 d_\infty(\hat{f})^{1-s_2} [\hat{R} + (v_{r'} + d_\infty(\hat{f}))\hat{R}]^{s_2} \leq c_2 d_\infty(\hat{f})^{1-s_2} [(1 + 2v_{\max})\hat{R}]^{s_2},
\end{aligned}$$

where the last inequality is shown, by the assumption (S-4),  $1 \geq \mu \geq \frac{2d_\infty(\hat{f})}{v_{\min}} \geq \frac{2d_\infty(\hat{f})}{v_{\max}}$ .

Therefore, it holds that

$$|E_3| \leq (d-1)\xi_n \left[ 2c_2(1 + 2v_{\max})^{s_2} d_\infty(\hat{f})^{1-s_2} \hat{R}^{K-1+s_2} \|\tilde{g}\|_{L_2} + 4(K-1)\hat{R}^K d_\infty(\hat{f}) \|\tilde{g}\|_{L_2} + \lambda_{1,n}^{1/2} \hat{R}^{2K} \right].$$

(4) (Bounding  $E_4$ ) Eq. (S-1) gives that

$$|E_4| \leq \xi_n \left( \left\| f_{(r,k)}^* \left( \prod_{k' \neq k} \tilde{f}_{(r,k')} - \prod_{k' \neq k} f_{(r,k')}^* \right) \tilde{g} \right\|_{L_2} + \lambda_{1,n}^{1/2} \hat{R}^{2K} \right).$$

The RHS is bounded as

$$\begin{aligned} & \left\| f_{(r,k)}^* \left( \prod_{k' \neq k} \tilde{f}_{(r,k')} - \prod_{k' \neq k} f_{(r,k')}^* \right) \tilde{g} \right\|_{L_2} \\ &= \left\| f_{(r,k)}^* (\tilde{f}'_{(r,k)} - f_{(r,k)}^*) \right\|_{L_2} \left\| \left( \prod_{k' \neq k} \tilde{f}_{(r,k')} - \prod_{k' \neq k} f_{(r,k')}^* \right) \prod_{k' \neq k} \tilde{f}_{(r,k')} \right\|_{L_2} \\ &\leq 2\hat{R} \|\tilde{g}\|_{L_2} \times 2K \hat{R}^{K-1} d_\infty(\hat{f})/v_{\min}, \end{aligned}$$

where we used the following relation in the last inequality:

$$\begin{aligned} \|f_{(r,k)}^* (\tilde{f}'_{(r,k)} - f_{(r,k)}^*)\|_{L_2} &\leq \|f_{(r,k)}^*\|_\infty \|\tilde{f}'_{(r,k)} - f_{(r,k)}^*\|_{L_2} \\ &\leq \|f_{(r,k)}^*\|_\infty \|\tilde{f}'_{(r,k)} - f_{(r,k)}^*\|_{L_2} (2\| \prod_{k' \neq k} \tilde{f}_{(r,k')} \|_{L_2}) \\ &= 2\|f_{(r,k)}^*\|_\infty \|(\tilde{f}'_{(r,k)} - f_{(r,k)}^*) \prod_{k' \neq k} \tilde{f}_{(r,k')}\|_{L_2} \leq 2\hat{R} \|\tilde{g}\|_{L_2}, \end{aligned}$$

and

$$\begin{aligned} & \left\| \left( \prod_{k' \neq k} \tilde{f}_{(r,k')} - \prod_{k' \neq k} f_{(r,k')}^* \right) \prod_{k' \neq k} \tilde{f}_{(r,k')} \right\|_{L_2} \\ &\leq \hat{R}^{K-1} \left\| \prod_{k' \neq k} \tilde{f}_{(r,k')} - \prod_{k' \neq k} f_{(r,k')}^* \right\|_{L_2} \\ &= \hat{R}^{K-1} \left\| \prod_{k' \neq k} \tilde{f}_{(r,k')} - \prod_{k' \neq k} f_{(r,k')}^* \right\|_{L_2} \leq \hat{R}^{K-1} \left( \sum_{k' \neq k} \frac{\|\tilde{f}_{(r,k')} - f_{(r,k')}^*\|_{L_2}}{\|\tilde{f}_{(r,k')}\|_{L_2}} \prod_{k'' \neq k} \|\tilde{f}_{(r,k'')}\|_{L_2} \right) \\ &\leq 2K \hat{R}^{K-1} d_\infty(\hat{f})/v_{\min}. \end{aligned}$$

Therefore, we have

$$|E_4| \leq 4K \hat{R}^K \xi_n d_\infty(\hat{f}) \|\tilde{g}\|_{L_2} + \xi_n \lambda_{1,n}^{1/2} \hat{R}^{2K}.$$

(5) Lemma A.5 gives an upper bound of the first term of the RHS as

$$|E_5| = \left| P \left[ \sum_{r' \neq r} (\tilde{f}_{r'} - f_{r'}^*) \tilde{g} \right] \right| \leq c_\mu d_\infty(\hat{f}) \|\tilde{g}\|_{L_2}.$$

(6) Lemma A.6 bounds the second term of the RHS as

$$|E_6| = \left| P \left[ f_{(r,k)}^* \left( \prod_{k' \neq k} \tilde{f}_{(r,k')} - \prod_{k' \neq k} f_{(r,k')}^* \right) \tilde{g} \right] \right| \leq \frac{4\hat{R}K^2}{v_{\min}^2} \|\tilde{g}\|_{L_2} d_\infty(\hat{f})^2.$$

Combining the results from (1) to (6), we have that

$$\begin{aligned} P(\tilde{g}^2) &\leq 2(1 + \hat{R}^K) \xi_n (\|\tilde{g}\|_{L_2} + \lambda_{2,n}^{1/2} \hat{R}^K) + (1 + \hat{R}^K) \xi_n (2K \|\tilde{g}\|_{L_2} d_\infty(\hat{f})/v_{\min} + \lambda_{1,n}^{1/2} \hat{R}^K) \\ &\quad + (d-1) \xi_n \left[ 2c_2 (1 + 2v_{\max})^{s_2} d_\infty(\hat{f})^{1-s_2} \hat{R}^{K-1+s_2} \|\tilde{g}\|_{L_2} + 4(K-1) d_\infty(\hat{f}) \hat{R}^K \|\tilde{g}\|_{L_2} \right] \end{aligned}$$

$$\begin{aligned}
& + \left[ 4K \hat{R}^K \xi_n + c_\mu + \frac{4\hat{R}K^2}{v_{\min}^2} d_\infty(\hat{f}) \right] \|\tilde{g}\|_{L_2} d_\infty(\hat{f}) \\
& + [(d-1)\xi_n \lambda_{1,n}^{1/2} + \xi_n \lambda_{1,n}^{1/2}] \hat{R}^{2K} \\
& = 2(1 + \hat{R}^K) \xi'_n \|\tilde{g}\|_{L_2} + 2(d-1)\xi_n c_2 (1 + 2v_{\max})^{s_2} d_\infty(\hat{f})^{1-s_2} \hat{R}^{K-1+s_2} \|\tilde{g}\|_{L_2} \\
& + \left[ \frac{2K(1 + \hat{R}^K)\xi_n}{v_{\min}} + 4(d-1)(K-1)\xi_n \hat{R}^K + 4K \hat{R}^K \xi_n + c_\mu + \frac{4\hat{R}K^2}{v_{\min}^2} d_\infty(\hat{f}) \right] \|\tilde{g}\|_{L_2} d_\infty(\hat{f}) \\
& + [2(1 + \hat{R}^K) \xi'_n \lambda_{2,n}^{1/2} + (\hat{R}^K + (d+1)\hat{R}^{2K}) \xi_n \lambda_{1,n}^{1/2}].
\end{aligned}$$

Then, by using the Cauchy-Schwarz inequality and the Young's inequality,

$$\begin{aligned}
& 2(1 + \hat{R}^K) \xi'_n \|\tilde{g}\|_{L_2} + 2(d-1)\xi_n c_2 (1 + 2v_{\max})^{s_2} d_\infty(\hat{f})^{1-s_2} \hat{R}^{K-1+s_2} \|\tilde{g}\|_{L_2} \\
& \leq \frac{1}{6} \|\tilde{g}\|_{L_2}^2 + 6(1 + \hat{R}^K)^2 \xi_n'^2 + \frac{1}{6} \|\tilde{g}\|_{L_2}^2 + 6[(d-1)\xi_n c_2 (1 + 2v_{\max})^{s_2} d_\infty(\hat{f})^{1-s_2} \hat{R}^{K-1+s_2}]^2 \\
& \leq \frac{1}{3} \|\tilde{g}\|_{L_2}^2 + 6(1 + \hat{R}^K)^2 \xi_n'^2 \\
& + \frac{1-s_2}{8} d_\infty(\hat{f})^2 + s_2 6^{1/s_2} 8^{(1-s_2)/s_2} [(d-1)c_2 (1 + 2v_{\max})^{s_2} \hat{R}^{K-1+s_2}]^{2/s_2} \xi_n'^{2/s_2},
\end{aligned}$$

and, we also have

$$\begin{aligned}
& \frac{1-s_2}{8} d_\infty(\hat{f})^2 + \\
& \left[ \frac{2K(1 + 2\hat{R}^K)\xi_n}{v_{\min}} + 4(d-1)(K-1)\xi_n \hat{R}^K + 4K \hat{R}^K \xi_n + c_\mu + \frac{4\hat{R}K^2}{v_{\min}^2} d_\infty(\hat{f}) \right] \|\tilde{g}\|_{L_2} d_\infty(\hat{f}) \\
& \leq \frac{1}{6} \|\tilde{g}\|_{L_2}^2 + \frac{3}{2} Q_n^2 d_\infty(\hat{f})^2,
\end{aligned}$$

where

$$Q_n = \frac{2K(1 + 2\hat{R}^K)\xi_n}{v_{\min}} + 4(d-1)(K-1)\xi_n \hat{R}^K + 4K \hat{R}^K \xi_n + c_\mu + \frac{4\hat{R}K^2}{v_{\min}^2} d_\infty(\hat{f}) + \sqrt{\frac{1-s_2}{8}}.$$

Moreover, since it holds that

$$\begin{aligned}
& 2 \frac{(1 + \hat{R}^K)}{\hat{R}^{2K}} \xi'_n \lambda_{2,n}^{1/2} + \frac{(\hat{R}^K + (d+1)\hat{R}^{2K})}{\hat{R}^{2K}} \xi_n \lambda_{1,n}^{1/2} \\
& + 6 \frac{(1 + \hat{R}^K)^2}{\hat{R}^{2K}} \xi_n'^2 + \frac{1}{\hat{R}^{2K}} s_2 \frac{48^{1/s_2}}{8} [(d-1)c_2 (1 + 2v_{\max})^{s_2} \hat{R}^{K-1+s_2}]^{2/s_2} \xi_n'^{2/s_2} \\
& \leq 4\xi_n' \lambda_{2,n}^{1/2} + (d+2)\xi_n \lambda_{1,n}^{1/2} + 12\xi_n'^2 + s_2 \frac{48^{1/s_2}}{8} [(d-1)c_2 (1 + 2v_{\max})^{s_2}]^{2/s_2} \hat{R}^{2(K-1)(1-s_2)/s_2} \xi_n'^{2/s_2} \\
& =: S_n,
\end{aligned}$$

we have that

$$\|\tilde{g}\|_{L_2}^2 \leq \frac{1}{2} \|\tilde{g}\|_{L_2}^2 + \frac{3}{2} Q_n^2 d_\infty(\hat{f})^2 + S_n \hat{R}^{2K} \quad (\text{S-14})$$

$$\Rightarrow \|\tilde{g}\|_{L_2}^2 \leq 3Q_n^2 d_\infty(\hat{f})^2 + 2S_n \hat{R}^{2K}. \quad (\text{S-15})$$

The left hand side is lower bounded as follows. Let  $\tilde{c} = \prod_{k' \neq k} \|\tilde{f}_{(r,k')}\|_{L_2} (= \prod_{k' \neq k} \|f_{(r,k')}^*\|_{L_2})$ . Remind that  $\bar{v}'_r = \|\tilde{f}'_{(r,k)}\|_{L_2} \prod_{k' \neq k} \|\tilde{f}_{(r,k')}\|_{L_2}$ ,  $\bar{f}_{(r',k')} = \tilde{f}_{(r',k')}/\|\tilde{f}_{(r',k')}\|_{L_2}$  ( $\forall (r',k') \neq (r,k)$ ) and  $\bar{f}'_{(r,k)} = \tilde{f}'_{(r,k)}/\|\tilde{f}'_{(r,k)}\|_{L_2}$ . Then  $\tilde{c}\tilde{f}'_{(r,k)} = \bar{v}'_r \bar{f}'_{(r,k)}$ . Note that  $v_r = \prod_{k'=1}^K \|f_{(r,k')}^*\|_{L_2} = \|f_{(r,k)}^*\|_{L_2} \tilde{c}$ . Thus,

$$\|\tilde{g}\|_{L_2}^2 = \|\tilde{f}'_{(r,k)} - f_{(r,k)}^*\|_{L_2}^2 \tilde{c}^2 = \|\bar{v}'_r \bar{f}'_{(r,k)} - v_r f_{(r,k)}^{**}\|_{L_2}^2.$$



Here, the RHS is lower bounded as

$$\begin{aligned} \|\bar{v}'_r \bar{f}'_{(r,k)} - v_r f^*_{(r,k)}\|_{L_2}^2 &\geq (\bar{v}'_r)^2 \|\bar{f}'_{(r,k)}\|_{L_2}^2 - 2\bar{v}'_r v_r \langle \bar{f}'_{(r,k)}, f^*_{(r,k)} \rangle_{L_2} + v_r^2 \|f^*_{(r,k)}\|_{L_2}^2 \\ &\geq (\bar{v}'_r)^2 - 2\bar{v}'_r v_r + v_r^2 \geq (\bar{v}'_r - v_r)^2. \end{aligned}$$

Moreover, we also have another lower bound as

$$\begin{aligned} \|\bar{v}'_r \bar{f}'_{(r,k)} - v_r f^*_{(r,k)}\|_{L_2} &= \|(\bar{v}'_r - v_r) \bar{f}'_{(r,k)} + v_r (\bar{f}'_{(r,k)} - f^*_{(r,k)})\|_{L_2} \\ &\geq -\|(\bar{v}'_r - v_r) \bar{f}'_{(r,k)}\|_{L_2} + v_r \|\bar{f}'_{(r,k)} - f^*_{(r,k)}\|_{L_2} = -|\bar{v}'_r - v_r| + v_r \|\bar{f}'_{(r,k)} - f^*_{(r,k)}\|_{L_2}. \end{aligned}$$

Therefore,

$$\|\tilde{g}\|_{L_2}^2 \geq \frac{1}{9} [v_r \|\bar{f}'_{(r,k)} - f^*_{(r,k)}\|_{L_2} + |\bar{v}'_r - v_r|]^2. \quad (\text{S-16})$$

Combining Eq. (S-15) and Eq. (S-16), we arrive at

$$\frac{1}{9} \left( v_r \|\bar{f}'_{(r,k)} - f^*_{(r,k)}\|_{L_2} + |\bar{v}'_r - v_r| \right)^2 \leq 3Q_n^2 d_\infty(\hat{f})^2 + 2S_n \hat{R}^{2K}.$$

This gives the first assertion.

Moreover, since  $\bar{f}'_{(r,k)} = \tilde{c} \tilde{f}'_{(r,k)} / \bar{v}'_r$ ,

$$\|\bar{f}'_{(r,k)}\|_{\mathcal{H}_{r,k}} = \frac{\tilde{c}}{\bar{v}'_r} \|\tilde{f}'_{(r,k)}\|_{\mathcal{H}_{r,k}} \leq \frac{2}{\bar{v}'_r} \|\tilde{f}'_{(r,k)}\|_{\mathcal{H}_{r,k}} \leq \frac{2}{v_r - \sqrt{\eta_n}} \tilde{R}$$

which gives the second assertion.  $\square$

## A.2 Key lemmas

**Lemma A.4.** *Under the same setting as in Theorem A.1, in the event  $\mathcal{E}_1$ , it holds that*

$$\left| \frac{1}{n} \sum_{i=1}^n \epsilon_i \tilde{g}(x_i) \right| \leq 2\xi'_n (\|\tilde{g}\|_{L_2} + \lambda_{2,n}^{1/2} \hat{R}^K) + \xi_n (2K \|\tilde{g}\|_{L_2} d_\infty(\hat{f}) / v_{\min} + \lambda_{1,n}^{1/2} \hat{R}^K).$$

and

$$|(P - P_n)(\tilde{g}^2)| \leq 2\hat{R}^K \xi'_n (\|\tilde{g}\|_{L_2} + \lambda_{2,n}^{1/2} \hat{R}^K) + \hat{R}^K \xi_n (2K \|\tilde{g}\|_{L_2} d_\infty(\hat{f}) / v_{\min} + \lambda_{1,n}^{1/2} \hat{R}^K).$$

*Proof.* First, note that

$$\begin{aligned} \frac{1}{n} \sum_{i=1}^n \epsilon_i \tilde{g}(x_i) &= \frac{1}{n} \sum_{i=1}^n \epsilon_i \prod_{k' \neq k} f^*_{(r,k')}(x_i) (\tilde{f}'_{(r,k)}(x_i) - f^*_{(r,k)}(x_i)) \\ &\quad + \frac{1}{n} \sum_{i=1}^n \epsilon_i \left( \prod_{k' \neq k} \tilde{f}_{(r,k')}(x_i) - \prod_{k' \neq k} f^*_{(r,k')}(x_i) \right) (\tilde{f}'_{(r,k)}(x_i) - f^*_{(r,k)}(x_i)). \end{aligned} \quad (\text{S-17})$$

Using Eq. (S-2b), the first term is bounded by

$$\xi'_n \left( \|\tilde{f}'_{(r,k)} - f^*_{(r,k)}\|_{L_2} + \lambda_{2,n}^{1/2} \hat{R}^K \right) \prod_{k' \neq k} \|f^*_{(r,k')}\|_{L_2}.$$

Since  $\prod_{k' \neq k} \|f^*_{(r,k')}\|_{L_2} = \prod_{k' \neq k} \|\tilde{f}_{(r,k')}\|_{L_2} \leq 2$  by the construction of  $f^*_{(r,k')}$ , the right hand side is upper bounded by  $2\xi'_n (\|\tilde{g}\|_{L_2} + \lambda_{2,n}^{1/2} \hat{R}^K)$ .

On the other hand, since Eq. (S-9) and Eq. (S-10) give  $\max\{\|f^*_{(r,k')}\|_{\mathcal{H}_{r,k'}}, \|\tilde{f}_{(r,k')}\|_{\mathcal{H}_{r,k'}}\} \leq \hat{R}$  ( $\forall k' \neq k$ ), Eq. (S-3a) gives an upper bound of the second term as

$$\xi_n \left( \left\| \prod_{k' \neq k} \tilde{f}_{(r,k')} - \prod_{k' \neq k} f^*_{(r,k')} \right\|_{L_2} \|\tilde{f}'_{(r,k)} - f^*_{(r,k)}\|_{L_2} + \lambda_{1,n}^{1/2} \hat{R}^K \right).$$

Since  $\|\tilde{f}_{(r,k')}\|_{L_2} = \|f_{(r,k')}^*\|_{L_2} \geq 1/2$  ( $\forall k' \neq k$ ), it holds that

$$\begin{aligned} & \left\| \prod_{k' \neq k} \tilde{f}_{(r,k')} - \prod_{k' \neq k} f_{(r,k')}^* \right\|_{L_2} \\ & \leq \sum_{k' \neq k} \left( \prod_{l < k', l \neq k} \|\tilde{f}_{(r,l)}\|_{L_2} \right) \|\tilde{f}_{(r,k')} - f_{(r,k')}^*\|_{L_2} \left( \prod_{l > k', l \neq k} \|f_{(r,l)}^*\|_{L_2} \right) \\ & \leq 2 \left\| \prod_{k' \neq k} \tilde{f}_{(r,k')} \right\|_{L_2} K d_\infty(\hat{f}) / v_{\min}. \end{aligned}$$

This and  $\|g\|_{L_2} = \|\tilde{f}'_{(r,k)} - f_{(r,k)}^*\|_{L_2} \prod_{k' \neq k} \|\tilde{f}_{(r,k')}\|_{L_2}$  give a bound of Eq. (S-17) as

$$\xi_n(2K\|\tilde{g}\|_{L_2} d_\infty(\hat{f}) / v_{\min} + \lambda_{1,n}^{1/2} \hat{R}^K).$$

The second assertion is also proven by the similar argument to the first assertion by noticing

$$\begin{aligned} & \left( \prod_{k' \neq k} \tilde{f}_{(r,k')}^2 - \prod_{k' \neq k} f_{(r,k')}^{*2} \right) (\tilde{f}'_{(r,k)} - f_{(r,k)}^*)^2 \\ & = \left( \prod_{k' \neq k} \tilde{f}_{(r,k')} - \prod_{k' \neq k} f_{(r,k')}^* \right) (\tilde{f}'_{(r,k)} - f_{(r,k)}^*) \times \left( \prod_{k' \neq k} \tilde{f}_{(r,k')} + \prod_{k' \neq k} f_{(r,k')}^* \right) (\tilde{f}'_{(r,k)} - f_{(r,k)}^*), \end{aligned}$$

and applying Eq. (S-2a) and Eq. (S-3b) instead of Eq. (S-2b) and Eq. (S-3a).  $\square$

**Lemma A.5.** Suppose that the Incoherent Assumption 4 is satisfied. Then, if  $\{\tilde{f}_{(r,k)}\}$  and  $\mu^*$  satisfy Eq. (S-5), then we have that

$$P \left[ \sum_{r' \neq r} (\tilde{f}_{r'} - f_{r'}^*) \tilde{g} \right] \leq c_\mu d_\infty(\hat{f}) \|\tilde{g}\|_{L_2}. \quad (\text{S-18})$$

Moreover,  $\{\tilde{f}_{(r,k)}\}_{r,k}$  are  $\mu$ -incoherent where  $\mu = 2 \frac{d_\infty(\hat{f})}{v_{\min}} + \mu^*$ .

*Proof.* First we show that  $\{\tilde{f}_{(r,k)}\}_{r,k}$  are  $\mu$ -incoherent. This can be shown that

$$\begin{aligned} & |\langle \bar{f}_{(r',k')}, \bar{f}_{(r'',k'')} \rangle| \\ & = |\langle \bar{f}_{(r',k')} - f_{(r',k')}^{**} + f_{(r',k')}^{**}, \bar{f}_{(r'',k'')} \rangle| \\ & = |\langle \bar{f}_{(r',k')} - f_{(r',k')}^{**}, \bar{f}_{(r'',k'')} \rangle| + |\langle f_{(r',k')}^{**}, \bar{f}_{(r'',k'')} - f_{(r'',k'')}^{**} + f_{(r'',k'')}^{**} \rangle| \\ & \leq \|\bar{f}_{(r',k')} - f_{(r',k')}^{**}\|_{L_2} \|\bar{f}_{(r'',k'')}\|_{L_2} + \|f_{(r',k')}^{**}\|_{L_2} \|\bar{f}_{(r'',k'')} - f_{(r'',k'')}^{**}\| + |\langle f_{(r',k')}^{**}, f_{(r'',k'')}^{**} \rangle| \\ & \leq 2 \frac{d_\infty(\hat{f})}{v_{\min}} + \mu^* \leq \mu. \end{aligned}$$

Let  $\Delta f_{(r',k')} = \bar{f}_{(r',k')} - f_{(r',k')}^{**}$  for  $k' \neq k$  and  $\Delta f_{(r',k)} = \bar{v}_{r'} \bar{f}_{(r',k)} - v_{r'} f_{(r',k)}^{**}$ . Then, for  $k' \neq k$ ,  $\bar{v}_{r'} \|\Delta f_{(r',k')}\|_{L_2} = v_{r'} \|\Delta f_{(r',k')}\|_{L_2} + |v_{r'} - \bar{v}_{r'}| \|\Delta f_{(r',k')}\|_{L_2} \leq v_{r'} \|\Delta f_{(r',k')}\|_{L_2} + 2|v_{r'} - \bar{v}_{r'}| \leq 2d_\infty(\hat{f})$ , and  $\|\Delta f_{(r',k)}\|_{L_2} \leq \|v_{r'} \bar{f}_{(r',k)} - v_{r'} f_{(r',k)}^{**}\|_{L_2} + |v_{r'} - \bar{v}_{r'}| \leq d_\infty(\hat{f})$ . Therefore, for sufficiently small  $d_\infty(\hat{f})$ , the LHS of Eq. (S-18) is bounded by

$$\begin{aligned} & P \left[ \sum_{r' \neq r} (\tilde{f}_{r'} - f_{r'}^*) \tilde{g} \right] \leq P \left[ \sum_{r' \neq r} [\tilde{f}_{r'} - (\bar{v}_{r'} \bar{f}_{(r',k)} - \Delta f_{(r',k)}) \prod_{k' \neq k} (\bar{f}_{(r',k')} - \Delta f_{(r',k')})] \tilde{g} \right] \\ & \leq \left| P \left[ \sum_{r' \neq r} \Delta f_{(r',k)} (\tilde{f}'_{(r,k)} - f_{(r,k)}^*) \left( \prod_{k' \neq k} \tilde{f}_{(r,k')} \right) \left( \prod_{k'' \neq k} (\bar{f}_{(r',k'')} - \Delta f_{(r',k'')}) \right) \right] \right| \\ & \quad + \left| P \left[ \sum_{r' \neq r} (\tilde{f}'_{(r,k)} - f_{(r,k)}^*) \bar{v}_{r'} \bar{f}_{(r',k)} \left( \prod_{k' \neq k} \tilde{f}_{(r,k')} \right) \left( \prod_{k'' \neq k} (\bar{f}_{(r',k'')} - \Delta f_{(r',k'')}) - \prod_{k'' \neq k} \bar{f}_{(r',k'')} \right) \right] \right| \end{aligned}$$

$$\begin{aligned}
&\leq \sum_{r' \neq r} \|\tilde{f}'_{(r,k)} - f^*_{(r,k)}\|_{L_2} \|\Delta f_{(r',k)}\|_{L_2} \prod_{k' \neq k} \|\tilde{f}_{(r,k')}\|_{L_2} \prod_{k'' \neq k} (\mu \|\tilde{f}_{(r',k'')}\|_{L_2} + \|\Delta f_{(r',k'')}\|_{L_2}) \\
&\quad + \sum_{r' \neq r} \sum_{k' \neq k} \|\tilde{f}'_{(r,k)} - f^*_{(r,k)}\|_{L_2} \bar{v}_{r'} \|\tilde{f}_{(r',k)}\|_{L_2} \|\Delta f_{(r',k')}\|_{L_2} \\
&\quad \times \prod_{k'' \neq k} \|\tilde{f}_{(r,k'')}\|_{L_2} \prod_{k''' \neq k, k'} (\mu \|\tilde{f}_{(r',k''')}\|_{L_2} + \|\Delta f_{(r',k''')}\|_{L_2}) \\
&\stackrel{(a)}{\leq} (d-1) \|\tilde{f}'_{(r,k)} - f^*_{(r,k)}\|_{L_2} \prod_{k' \neq k} \|\tilde{f}_{(r,k')}\|_{L_2} d_\infty(\hat{f}) \left[ \left( \mu + \frac{d_\infty(\hat{f})}{v_{\min}} \right)^{K-1} + 2K \left( \mu + \frac{d_\infty(\hat{f})}{v_{\min}} \right)^{K-2} \right] \\
&\stackrel{(b)}{\leq} \|\tilde{g}\|_{L_2} d_\infty(\hat{f}) (d-1) \left[ \left( \mu + \frac{\mu}{2} \right)^{K-1} + 2K \left( \mu + \frac{\mu}{2} \right)^{K-2} \right] \\
&\stackrel{(c)}{\leq} c_\mu \|\tilde{g}\|_{L_2} d_\infty(\hat{f}),
\end{aligned}$$

where, in the inequality (a), we used the relation  $\|\Delta f_{(r',k)}\|_{L_2} \leq d_\infty(\hat{f})$ ,  $\bar{v}_{r'} \|\Delta f_{(r',k')}\|_{L_2} \leq 2d_\infty(\hat{f})$  for  $k' \neq k$ , and  $\|\Delta f_{(r',k')}\|_{L_2} \leq \frac{d_\infty(\hat{f})}{v_{\min}}$  for  $k' \neq k$ ; in the inequality (b), we used the assumption on  $\mu$  and  $d_\infty(\hat{f})$ ; and, in the final inequality (c), we used the definition of  $c_\mu$ .  $\square$

**Lemma A.6.** *If  $\prod_{k' \neq k} \|\tilde{f}_{(r,k')}\|_{L_2} \geq 1/2$ , then*

$$P \left[ f^*_{(r,k)} \left( \prod_{k' \neq k} \tilde{f}_{(r,k')} - \prod_{k' \neq k} f^*_{(r,k')} \right) \tilde{g} \right] \leq \frac{2\hat{R}K^2}{v_{\min}^2} \|\tilde{g}\|_{L_2} d_\infty(\hat{f})^2.$$

*Proof.* Because  $P_{\mathcal{X}}$  is a product measure given by  $P_{\mathcal{X}} = P_1 \times \dots \times P_K$ , we have that

$$\begin{aligned}
P \left[ f^*_{(r,k)} \left( \prod_{k' \neq k} \tilde{f}_{(r,k')} - \prod_{k' \neq k} f^*_{(r,k')} \right) \tilde{g} \right] &= P \left[ f^*_{(r,k)} (\tilde{f}_{(r,k)} - f^*_{(r,k)}) \left( \prod_{k' \neq k} \tilde{f}_{(r,k')} - \prod_{k' \neq k} f^*_{(r,k')} \right) \prod_{k' \neq k} \tilde{f}_{(r,k')} \right] \\
&= P \left[ f^*_{(r,k)} (\tilde{f}_{(r,k)} - f^*_{(r,k)}) \right] \times P \left[ \left( \prod_{k' \neq k} \tilde{f}_{(r,k')} - \prod_{k' \neq k} f^*_{(r,k')} \right) \prod_{k' \neq k} \tilde{f}_{(r,k')} \right] \\
&\leq \|f^*_{(r,k)}\|_\infty \|\tilde{f}_{(r,k)} - f^*_{(r,k)}\|_{L_2} P \left[ \prod_{k' \neq k} \tilde{f}_{(r,k')}^2 - \prod_{k' \neq k} f^*_{(r,k')} \prod_{k' \neq k} \tilde{f}_{(r,k')} \right],
\end{aligned}$$

where we used the Cauchy-Schwarz inequality in the second line. Here, by the construction of  $\hat{f}_{(r,k)}$ , we have that  $\|\prod_{k' \neq k} \tilde{f}_{(r,k')}\|_{L_2} = \|\prod_{k' \neq k} f^*_{(r,k')}\|_{L_2}$  and thus

$$P \left[ \prod_{k' \neq k} \tilde{f}_{(r,k')} \prod_{k' \neq k} \tilde{f}_{(r,k')} - \prod_{k' \neq k} f^*_{(r,k')} \prod_{k' \neq k} \tilde{f}_{(r,k')} \right] = \frac{1}{2} \left\| \prod_{k' \neq k} \tilde{f}_{(r,k')} - \prod_{k' \neq k} f^*_{(r,k')} \right\|_{L_2}^2.$$

Here, since it holds that

$$\begin{aligned}
&\left\| \prod_{k' \neq k} \tilde{f}_{(r,k')} - \prod_{k' \neq k} f^*_{(r,k')} \right\|_{L_2} \\
&\leq \sum_{k' \neq k} \left( \|\tilde{f}_{(r,k')} - f^*_{(r,k')}\|_{L_2} \prod_{k'' < k', k'' \neq k} \|\tilde{f}_{(r,k'')}\|_{L_2} \prod_{k'' > k', k'' \neq k} \|f^*_{(r,k'')}\|_{L_2} \right) \\
&\leq 2^{\frac{K-1}{K}} \sum_{k' \neq k} \|\tilde{f}_{(r,k')} - f^*_{(r,k')}\|_{L_2} / \|\tilde{f}_{(r,k')}\|_{L_2} \leq 2K d_\infty(\hat{f}) / v_{\min},
\end{aligned}$$

we have that

$$P \left[ f^*_{(r,k)} \left( \prod_{k' \neq k} \tilde{f}_{(r,k')} - \prod_{k' \neq k} f^*_{(r,k')} \right) \tilde{g} \right] \leq \|f^*_{(r,k)}\|_\infty \|\tilde{f}_{(r,k)} - f^*_{(r,k)}\|_{L_2} 2K^2 d_\infty(\hat{f})^2 / v_{\min}^2.$$

Moreover, since  $\|f_{(r,k)}^*\|_\infty \leq \|f_{(r,k)}^*\|_{\mathcal{H}_{r,k}} \leq \hat{R}$  (Eq. (S-9)) and  $\prod_{k' \neq k} \|\tilde{f}_{(r,k')}\|_{L_2} \geq 1/2$  gives  $\|\tilde{f}_{(r,k)} - f_{(r,k)}^*\|_{L_2} \leq 2\|\tilde{g}\|_{L_2}$ , we have that

$$P\left[f_{(r,k)}^* \left(\prod_{k' \neq k} \tilde{f}_{(r,k')} - \prod_{k' \neq k} f_{(r,k')}^*\right) \tilde{g}\right] \leq \frac{4\hat{R}K^2}{v_{\min}^2} \|\tilde{g}\|_{L_2} d_\infty(\hat{f})^2.$$

□

**Lemma A.7.** *If  $\{\hat{f}_{(r,k)}\}_{r,k}$  and  $\{f_{(r,k)}^*\}_{r,k}$  are  $\mu$ -incoherent, then we have*

$$\|\hat{f} - f^*\|_{L_2}^2 \leq dK d_\infty(\hat{f})^2 + \frac{dK^2}{v_{\min}^2} d_\infty(\hat{f})^4 + d^2 K^2 \mu d_\infty(\hat{f})^2.$$

*Proof.*

$$\|\hat{f} - f^*\|_{L_2}^2 = \left\| \sum_{r=1}^d \sum_{k=1}^K \prod_{l < k} \hat{f}_{(r,l)} (\hat{f}_{(r,k)} - f_{(r,k)}^{**}) \prod_{l > k} f_{(r,l)}^{**} \right\|_{L_2}^2$$

Let

$$\Delta \hat{f}_{(r,k)} := \prod_{l < k} \hat{f}_{(r,l)} (\hat{f}_{(r,k)} - f_{(r,k)}^{**}) \prod_{l > k} f_{(r,l)}^{**}.$$

Now we set  $\hat{f}_{(r,k)} = \bar{f}_{(r,k)}$  ( $\forall r \in [d], k \in [K-1]$ ),  $\hat{f}_{(r,K)} = \bar{v}_r \bar{f}_{(r,K)}$  ( $\forall r \in [d]$ ),  $f_{(r,k)}^* = f_{(r,k)}^{**}$  ( $\forall r \in [d], k \in [K-1]$ ), and  $f_{(r,K)}^* = v_r f_{(r,K)}^{**}$  ( $\forall r \in [d]$ ). Then, it holds that, for all  $r \in [d]$ ,

$$\begin{aligned} \Delta \hat{f}_{(r,k)} &= v_r \prod_{l < k} \bar{f}_{(r,l)} (\bar{f}_{(r,k)} - f_{(r,k)}^{**}) \prod_{l > k} f_{(r,l)}^{**} \quad (\forall k < K), \\ \Delta \hat{f}_{(r,K)} &= \prod_{l < K} \bar{f}_{(r,l)} (\bar{v}_r \bar{f}_{(r,K)} - v_r f_{(r,K)}^{**}). \end{aligned}$$

By the definition of  $\Delta \hat{f}_{(r,k)}$ , we have that

$$\begin{aligned} (\hat{f} - f^*)^2 &= \left( \sum_{r=1}^d \sum_{k=1}^K \Delta \hat{f}_{(r,k)} \right)^2 \\ &= \sum_{r=1}^d \left( \sum_{k=1}^K \Delta \hat{f}_{(r,k)}^2 + \sum_{k \neq k'} \Delta \hat{f}_{(r,k)} \Delta \hat{f}_{(r,k')} \right) + \sum_{r \neq r'} \sum_{k=1}^K \sum_{k'=1}^K \Delta \hat{f}_{(r,k)} \Delta \hat{f}_{(r',k')}. \end{aligned}$$

We evaluate each term. If  $k < K$ , we have

$$P(\Delta \hat{f}_{(r,k)}^2) = v_r^2 \|\bar{f}_{(r,k)} - f_{(r,k)}^{**}\|_{L_2}^2 \leq d_\infty(\hat{f})^2,$$

otherwise, we have

$$\begin{aligned} P(\Delta \hat{f}_{(r,K)}^2) &= \|\bar{v}_r \bar{f}_{(r,K)} - v_r f_{(r,K)}^{**}\|_{L_2}^2 \leq \left( \bar{v}_r \|\bar{f}_{(r,K)} - f_{(r,K)}^{**}\|_{L_2} + |\bar{v}_r - v_r| \|\bar{f}_{(r,K)}\|_{L_2} \right)^2 \\ &\leq d_\infty(\hat{f})^2. \end{aligned}$$

Next we evaluate the term  $\Delta \hat{f}_{(r,k)} \Delta \hat{f}_{(r,k')}$  with  $k \neq k'$ . If  $k < k' < K$ , then

$$\begin{aligned} &P(\Delta \hat{f}_{(r,k)} \Delta \hat{f}_{(r,k')}) \\ &\leq v_r^2 P[(\bar{f}_{(r,k)} - f_{(r,k)}^{**}) \bar{f}_{(r,k)}] P[f_{(r,k')}^{**} (\bar{f}_{(r,k')} - f_{(r,k')}^{**})] \\ &= v_r^2 |(1 - P[f_{(r,k)}^{**} \bar{f}_{(r,k)}]) (P[f_{(r,k')}^{**} (\bar{f}_{(r,k')}] - 1)| \quad (\because \|f_{(r,k)}^{**}\|_{L_2} = \|\bar{f}_{(r,k)}\|_{L_2} = 1) \\ &= v_r^2 \frac{1}{4} |P[(f_{(r,k)}^{**})^2 - 2f_{(r,k)}^{**} \bar{f}_{(r,k)} + (\bar{f}_{(r,k)})^2] P[2f_{(r,k')}^{**} \bar{f}_{(r,k')} - (f_{(r,k')}^{**})^2 - (\bar{f}_{(r,k')})^2]| \\ &\quad (\because \|f_{(r,k)}^{**}\|_{L_2} = \|\bar{f}_{(r,k)}\|_{L_2} = 1) \end{aligned}$$

$$\begin{aligned}
&= v_r^2 \|f_{(r,k)}^{**} - \bar{f}_{(r,k)}\|_{L_2}^2 \|f_{(r,k')}^{**} - \bar{f}_{(r,k')}\|_{L_2}^2 \\
&\leq d_\infty(\hat{f})^4 / v_{\min}^2.
\end{aligned}$$

On the other hand, if  $k < k' = K$ , then, with a similar argument, we have

$$P(\Delta \hat{f}_{(r,k)} \Delta \hat{f}_{(r,k')}) \leq d_\infty(\hat{f})^4 / v_{\min}^2.$$

Finally, we evaluate the term  $\Delta \hat{f}_{(r,k)} \Delta \hat{f}_{(r',k')}$  with  $r \neq r'$  ( $k$  and  $k'$  could be same). If  $1 < k, k' < K$ , we have

$$\begin{aligned}
&P(\Delta \hat{f}_{(r,k)} \Delta \hat{f}_{(r',k)}) \\
&\leq v_r v_{r'} |P \bar{f}_{(r,1)} \bar{f}_{(r',1)}| \times \|\bar{f}_{(r,k)} - f_{(r,k)}^{**}\|_{L_2} \|\bar{f}_{(r',k')} - f_{(r',k')}^{**}\|_{L_2} \leq \mu d_\infty(\hat{f})^2,
\end{aligned}$$

else, we also have the same upper bound.

Combining these inequalities, we have that

$$\|\hat{f} - f^*\|_{L_2}^2 \leq dK d_\infty(\hat{f})^2 + \frac{dK^2}{v_{\min}^2} d_\infty(\hat{f})^4 + d^2 K^2 \mu d_\infty(\hat{f})^2.$$

□

### A.3 Technical lemmas

Here we give some technical lemmas to show the main theorem (Theorem A.1).

We denote by  $\{\sigma_i\}_{i=1}^n$  the Rademacher random variable that is an i.i.d. random variable such that  $\sigma_i \in \{\pm 1\}$ . It is known that, for a set of measurable functions  $\mathcal{F}$  that is separable with respect to  $\infty$ -norm, the *Rademacher complexity*  $\mathbb{E}[\sup_{f \in \mathcal{F}} \frac{1}{n} \sum_{i=1}^n \sigma_i f(x_i)]$  of  $\mathcal{F}$  bounds the supremum of the discrepancy between the empirical and population means of all functions  $f \in \mathcal{F}$  (see Lemma 2.3.1 of [8]):

$$\mathbb{E} \left[ \sup_{f \in \mathcal{F}} \left| \frac{1}{n} \sum_{i=1}^n (f(x_i) - \mathbb{E}[f]) \right| \right] \leq 2 \mathbb{E} \left[ \sup_{f \in \mathcal{F}} \left| \frac{1}{n} \sum_{i=1}^n \sigma_i f(x_i) \right| \right], \quad (\text{S-19})$$

where the expectations are taken for both  $\{x_i\}_{i=1}^n$  and  $\{\sigma_i\}_{i=1}^n$ .

The following proposition is the key in our analysis.

**Proposition A.8.** *Let  $\mathcal{B}_{\delta,a,b} \subset L_2(P_{\mathcal{X}})$  be a set such that  $\forall f \in \mathcal{B}_{\delta,a,b}$  satisfies  $\|f\|_{L_2} \leq \delta$ ,  $\|f\|_\infty \leq b$ , and it has a complexity bound like Assumption 2 such that*

$$e_i(\mathcal{B}_{\delta,a,b}, L_2(P_{\mathcal{X}})) \leq ai^{-\frac{1}{2s}}.$$

*Then, there exist constants  $C'_s$  depending only on  $s$  such that*

$$\mathbb{E} \left[ \sup_{f \in \mathcal{B}_{\delta,a,b}} \left| \frac{1}{n} \sum_{i=1}^n \sigma_i f(x_i) \right| \right] \leq C'_s \left( \frac{\delta^{1-s} a^s}{\sqrt{n}} \vee a^{\frac{2s}{1+s}} b^{\frac{1-s}{1+s}} n^{-\frac{1}{1+s}} \right).$$

*Proof.* The proof is given by combining Theorem 7.16 and Corollary 7.31 of [4]. □

Using Proposition A.8 and the *peeling device* [7], we obtain the following lemma (see also [3, 5]).

**Lemma A.9.** *Under the Complexity Assumption (Assumption 2) and the Infinity-Norm Assumption (Assumption 3), there exists a constant  $C_s$  depending only on  $s, s_2$  and  $c, c_2$  such that for all  $\lambda > 0$*

$$\mathbb{E} \left[ \sup_{f_{(r,k)} \in \mathcal{H}_{r,k} : \|f_{(r,k)}\|_{\mathcal{H}_{r,k}} \leq 1} \frac{|\frac{1}{n} \sum_{i=1}^n \sigma_i \prod_{k=1}^K f_{(r,k)}(x_i)|}{\prod_{k=1}^K \|f_{(r,k)}\|_{L_2} + \lambda^{\frac{1}{2}}} \right] \leq C_s \left( \frac{K^{\frac{1+2s}{2}} \lambda^{-\frac{s}{2}}}{\sqrt{n}} \vee \frac{K^{\frac{1+2s}{1+s}} \lambda^{-\frac{2s+(1-s)s_2}{2(1+s)}}}{n^{\frac{1}{1+s}}} \right).$$

*Proof.* (Lemma A.9) Let  $\mathcal{H}_{r,k}(\delta) := \{f \in \mathcal{H}_{r,k} \mid \|f\|_{\mathcal{H}_{r,k}} \leq 1, \|f\|_{L_2} \leq \delta\}$  and  $z = 2^{1/s} > 1$ . We evaluate the entropy number of the set  $\mathcal{B} = \{\prod_{k=1}^K f_k \mid f_k \in \mathcal{H}_{r,k}(\delta_k)\}$ . For all  $f \in \mathcal{B}$ , we have

$\|f\|_{L_2} \leq \prod_{k=1}^K \delta_k$  because for  $f = \prod_{k=1}^K f_k$  it holds that  $\|f\|_{L_2} = \prod_{k=1}^K \|f_k\|_{L_2}$ . Moreover, since  $\|f_k\|_\infty \leq \|f_k\|_{\mathcal{H}_{r,k}}$  ( $f_k \in \mathcal{H}_{r,k}$ ), we have  $\|f\|_\infty \leq 1$  for all  $f \in \mathcal{B}$ . The  $L_2(P_{\mathcal{X}})$  norm between  $f = \prod_k f_k$  and  $f' = \prod_k f'_k$  such that  $\|f_k - f'_k\|_{L_2} \leq \tilde{\epsilon}$  is upper bounded by

$$\begin{aligned} \left\| \prod_k f_k - \prod_k f'_k \right\|_{L_2} &= \left\| \sum_{k=1}^K f_1 \cdots f_{k-1} (f_k - f'_k) f'_{k+1} \cdots f'_K \right\|_{L_2} \\ &\leq \sum_{k=1}^K \|f_1\|_{L_2} \cdots \|f_{k-1}\|_{L_2} \|f_k - f'_k\|_{L_2} \|f'_{k+1}\|_{L_2} \cdots \|f'_K\|_{L_2} \leq K \tilde{\epsilon}. \end{aligned}$$

Therefore, if  $\{f_{k,j}\}_{j=1}^{N_k}$  be the  $\tilde{\epsilon}$ -net of  $\mathcal{H}_{r,k}(\delta_k)$  where  $N_k = \mathcal{N}(\tilde{\epsilon}, \mathcal{H}_{r,k}(\delta_k), L_2(P_{\mathcal{X}}))$ , then the set  $\mathcal{E} = \{f = \prod_{k=1}^K f_{k,j_k} \mid 1 \leq j_k \leq N_k\}$  is the  $K\tilde{\epsilon}$ -net of  $\mathcal{B}$ . Therefore,  $\log \mathcal{N}(\tilde{\epsilon}K, \mathcal{B}, L_2(P_{\mathcal{X}})) \leq \log(\prod_{k=1}^K N_k)$ . By the entropy condition of  $\mathcal{H}_{r,k}$ , there exists  $c'$  (depending on  $c$  and  $s$ ) such that  $N_k \leq c' \tilde{\epsilon}^{-2s}$ , thus for  $\epsilon = \tilde{\epsilon}K$ , we have that  $\log \mathcal{N}(\epsilon, \mathcal{B}, L_2(P_{\mathcal{X}})) \leq \sum_{k=1}^K c' (\epsilon/K)^{-2s} \leq c' K^{1+2s} \epsilon^{-2s}$ . This gives that there exists  $C'$  depending on only  $s$  and  $c$  such that the entropy number of  $\mathcal{B}$  is bounded by

$$e_i(\mathcal{B}, L_2(P_{\mathcal{X}})) \leq C' K^{\frac{1+2s}{2s}} i^{-\frac{1}{2s}}. \quad (\text{S-20})$$

Let  $\mathcal{B}(\delta) := \{f = \prod_{k=1}^K f_k \mid \|f\|_{L_2} \leq \delta, f_k \in \mathcal{H}_{r,k}, \|f_k\|_{\mathcal{H}_{r,k}} \leq 1\}$  and  $\tilde{c}_s = K^{\frac{1+2s}{2s}}$ . Then Proposition A.8, the entropy number bound (S-20) and the Infinity-Norm Assumption (Assumption 3) give that

$$\begin{aligned} &\mathbb{E} \left[ \sup_{f_k \in \mathcal{H}_{r,k}: \|f_k\|_{\mathcal{H}_{r,k}} \leq 1} \frac{|\frac{1}{n} \sum_{i=1}^n \sigma_i \prod_{k=1}^K f_k|}{\prod_{k=1}^K \|f_k\|_{L_2} + \lambda^{\frac{1}{2}}} \right] \\ &\leq \mathbb{E} \left[ \sup_{f \in \mathcal{B}(\lambda^{1/2})} \frac{|\frac{1}{n} \sum_{i=1}^n \sigma_i f(x_i)|}{\|f\|_{L_2} + \lambda^{\frac{1}{2}}} \right] \\ &\quad + \sum_{i=1}^{\infty} \mathbb{E} \left[ \sup_{f \in \mathcal{B}(z^i \lambda^{1/2}) \setminus \mathcal{H}_{r,k}(z^{i-1} \lambda^{1/2})} \frac{|\frac{1}{n} \sum_{i=1}^n \sigma_i f(x_i)|}{\|f\|_{L_2} + \lambda^{\frac{1}{2}}} \right] \\ &\leq C'_s \left( \frac{\lambda^{\frac{1-s}{2}} \tilde{c}_s^s}{\lambda^{\frac{1}{2}} \sqrt{n}} \vee \frac{\tilde{c}_s^{\frac{2s}{1+s}} (c_2 \lambda^{\frac{1-s_2}{2}})^{\frac{1-s}{1+s}}}{n^{\frac{1}{1+s}} \lambda^{\frac{1}{2}}} \right) + \sum_{i=1}^{\infty} C'_s \left( \frac{z^{i(1-s)} \lambda^{\frac{1-s}{2}} \tilde{c}_s^s}{\sqrt{n} z^{(i-1)} \lambda^{\frac{1}{2}}} \vee \frac{\tilde{c}_s^{\frac{2s}{1+s}} [c_2 (z^i \lambda^{\frac{1}{2}})^{1-s_2}]^{\frac{1-s}{1+s}}}{n^{\frac{1}{1+s}} z^{(i-1)} \lambda^{\frac{1}{2}}} \right) \\ &\leq 4C'_s \left( \frac{1}{1-z^{-s}} \tilde{c}_s^s \sqrt{\frac{\lambda^{-s}}{n}} + \frac{\tilde{c}_s^{\frac{2s}{1+s}} c_2^{\frac{1-s}{1+s}}}{1-z^{-\frac{2s+(1-s)s_2}{1+s}}} \left( \frac{\lambda^{-\frac{1}{2} + \frac{(1-s_2)(1-s)}{2(1+s)}}}{n^{\frac{1}{1+s}}} \right) \right) \\ &= 4C'_s \left( 2\tilde{c}_s^s \sqrt{\frac{\lambda^{-s}}{n}} + \frac{2^{\frac{2s+(1-s)s_2}{s(1+s)}}}{2^{\frac{2s+(1-s)s_2}{s(1+s)}} - 1} \tilde{c}_s^{\frac{2s}{1+s}} c_2^{\frac{1-s}{1+s}} \left( \frac{\lambda^{-\frac{2s+(1-s)s_2}{2(1+s)}}}{n^{\frac{1}{1+s}}} \right) \right) \\ &\leq 4C'_s \left( 2 + \frac{2^{\frac{2s+(1-s)s_2}{s(1+s)}}}{2^{\frac{2s+(1-s)s_2}{s(1+s)}} - 1} c_2^{\frac{1-s}{1+s}} \right) \left( \tilde{c}_s^s \sqrt{\frac{\lambda^{-s}}{n}} \vee \left( \frac{\tilde{c}_s^{\frac{2s}{1+s}} \lambda^{-\frac{2s+(1-s)s_2}{2(1+s)}}}{n^{\frac{1}{1+s}}} \right) \right). \end{aligned}$$

By setting  $C_s \leftarrow 4C'_s \left( 2 + \frac{2^{\frac{2s+(1-s)s_2}{s(1+s)}}}{2^{\frac{2s+(1-s)s_2}{s(1+s)}} - 1} c_2^{\frac{1-s}{1+s}} \right)$ , we obtain the assertion.  $\square$

The Lemma A.9 gives the following bound.

**Lemma A.10.** *Under the Complexity Assumption (Assumption 2) and the Infinity-Norm Assumption (Assumption 3), there exists a constant  $C_s$  depending only on  $s, s_2$  and  $c, c_2$  such that for all  $\lambda > 0$*

$$\mathbb{E} \left[ \sup_{f_{(r,k)} \in \mathcal{H}_{r,k}: \|f_{(r,k)}\|_{\mathcal{H}_{r,k}} \leq 1} \frac{|\frac{1}{n} \sum_{i=1}^n \epsilon_i \prod_{k=1}^K f_{(r,k)}(x_i)|}{\prod_{k=1}^K \|f_{(r,k)}\|_{L_2} + \lambda^{\frac{1}{2}}} \right] \leq C_s L \left( \frac{K^{\frac{1+2s}{2}} \lambda^{-\frac{s}{2}}}{\sqrt{n}} \vee \frac{K^{\frac{1+2s}{1+s}} \lambda^{-\frac{2s+(1-s)s_2}{2(1+s)}}}{n^{\frac{1}{1+s}}} \right).$$

*Proof.* By applying the contraction inequality [2, Theorem 4.12] to the bound of Lemma A.9, the assertion is proven.  $\square$

Let  $\mathcal{T}_r := \{f - g \mid f = \prod_{k=1}^K f_k, g = \prod_{k=1}^K g_k \text{ where } f_k, g_k \in \mathcal{H}_{r,k} (k = 1, \dots, K)\}$ . Similarly to Lemma A.9, we have the following bound.

**Lemma A.11.** *Under the Complexity Assumption (Assumption 2) and the Infinity-Norm Assumption (Assumption 3), there exists a constant  $\tilde{C}_s$  depending only on  $s, s_2$  and  $c, c_2$  such that for all  $\lambda > 0$*

$$\mathbb{E} \left[ \sup_{(f, f') \in \mathcal{T}_r \times \mathcal{T}_{r'}} \frac{|\frac{1}{n} \sum_{i=1}^n \sigma_i f(x_i) f'(x_i)|}{\|f f'\|_{L_2} + \lambda^{\frac{1}{2}}} \right] \leq \tilde{C}_s \left( \frac{K^{\frac{1+2s}{2}} \lambda^{-\frac{s}{2}}}{\sqrt{n}} \vee \frac{K^{\frac{1+2s}{1+s}}}{\lambda^{\frac{2s+(1-s)s_2}{2(1+s)}} n^{\frac{1}{1+s}}} \right).$$

*Proof.* Let  $\mathcal{B} = \{f(x)f'(x) \mid f \in \mathcal{T}_r, f' \in \mathcal{T}_{r'}\}$ . Along with the same argument with the proof of Lemma A.9, the entropy number of  $\mathcal{B}$  is bounded by

$$e_i(\mathcal{B}, L_2(P_X)) \leq \tilde{C}' K^{\frac{1+2s}{2s}} i^{-\frac{1}{2s}},$$

where  $\tilde{C}'_s$  is a constant depending on only  $s$  and  $c$ . Then, using the peeling device as in Lemma A.9, we obtain the assertion.  $\square$

Let the upper bound given in Lemmas A.9 and A.11 be  $\zeta_n(\lambda)$ :

$$\zeta_n(\lambda) = \zeta_n := \max\{C_s, \tilde{C}_s\} \left( \frac{K^{\frac{1+2s}{2}} \lambda^{-\frac{s}{2}}}{\sqrt{n}} \vee \frac{K^{\frac{1+2s}{1+s}}}{\lambda^{\frac{2s+(1-s)s_2}{2(1+s)}} n^{\frac{1}{1+s}}} \right),$$

where  $C_s$  and  $\tilde{C}_s$  are the constants appeared in each lemma respectively. Lemma A.9 and Lemma A.11.

In addition to Lemma A.11, we obtain the following tail probability bound.

**Lemma A.12.** *Under the Complexity Assumption (Assumption 2) and the Infinity-Norm Assumption (Assumption 3), there exists a universal constant  $C > 0$  such that, for any  $0 < \lambda$ , it holds that*

$$\sup_{f \in \mathcal{T}_r, f' \in \mathcal{T}_{r'}} \left| (P - P_n) \left( \frac{f f'}{\|f f'\|_{L_2} + \lambda^{\frac{1}{2}}} \right) \right| \leq C \zeta_n \max\{1, \tau\}$$

with probability  $1 - \exp(-\tau)$  for all  $\tau > 0$ .

*Proof.* We apply Talagrand's concentration inequality [6, 1]. To apply Talagrand's inequality, we need to bound the  $L_2$ -norm and the sup-norm of each term in the supremum in the LHS. They are bounded as

$$\mathbb{E}_X \left( \frac{(f(X)f'(X))^2}{(\|f f'\|_{L_2} + \lambda^{\frac{1}{2}})^2} \right) \leq 1, \quad \frac{|f'(X)f(X)|}{\|f f'\|_{L_2} + \lambda^{\frac{1}{2}}} \leq \frac{4}{\lambda^{1/2}}.$$

Moreover, by Eq. (S-19), it holds that

$$\begin{aligned} & \mathbb{E} \left[ \sup_{(f, f') \in \mathcal{T}_r \times \mathcal{T}_{r'}} |(P - P_n)(f f' / (\|f f'\|_{L_2} + \lambda^{1/2}))| \right] \\ & \leq 2\mathbb{E} \left[ \sup_{(f, f') \in \mathcal{T}_r \times \mathcal{T}_{r'}} \left| \frac{1}{n} \sum_{i=1}^n \sigma_i (f(x_i) f'(x_i) / (\|f f'\|_{L_2} + \lambda^{1/2})) \right| \right]. \end{aligned}$$

Therefore, by Talagrand's concentration inequality and Lemma A.10, there exists a universal constant  $C > 0$  such that

$$P \left( \sup_{f, f' \in \mathcal{T}_r \times \mathcal{T}_{r'}} \frac{|\frac{1}{n} \sum_{i=1}^n \sigma_i f(x_i) f'(x_i)|}{\|f f'\|_{L_2} + \lambda^{\frac{1}{2}}} \geq C \left[ 2\zeta_n + \sqrt{\frac{\tau}{n}} + \frac{4\lambda^{-1/2}\tau}{n} \right] \right) \leq e^{-\tau},$$

for all  $\tau > 0$ . By the definition of  $\zeta_n$ , the right hand side is upper bounded by  $7C\zeta_n \max\{1, \tau\}$ . Then, we obtain the assertion.  $\square$

Using the same argument, the following bound also holds.

**Corollary A.13.** *Under the Complexity Assumption (Assumption 2) and the Infinity-Norm Assumption (Assumption 3), there exists a universal constant  $\tilde{C} > 0$  such that, for any  $0 < \lambda$ , it holds that*

$$\max_{1 \leq r, r' \leq d} \sup_{f \in \mathcal{T}_r, f' \in \mathcal{T}_{r'}} \left| (P - P_n) \left( \frac{ff'}{\|ff'\|_{L_2} + \lambda^{\frac{1}{2}}} \right) \right| \leq \tilde{C} \log(d) \zeta_n \max\{1, \tau\}$$

with probability  $1 - \exp(-\tau)$  for all  $\tau > 0$ .

*Proof.* Taking the uniform bound with respect to  $r, r'$  of Lemma A.13. We obtain the assertion.  $\square$

Let  $\tilde{\mathcal{T}}_{r,k} = \{(f_{(r,k)} - f'_{(r,k)})(\prod_{k' \neq k} f_{(r,k')} - \prod_{k' \neq k} f'_{(r,k')}) \mid f_{(r,k)} \in \mathcal{H}_{r,k}, f'_{(r,k')} \in \mathcal{H}_{r,k'} (k' = 1, \dots, K)\}$ . Then by the same argument as Corollary A.13, we have the following lemma.

**Lemma A.14.** *Under the Complexity Assumption (Assumption 2) and the Infinity-Norm Assumption (Assumption 3), there exists a universal constant  $\tilde{C}' > 0$  such that, for any  $0 < \lambda$ , it holds that*

$$\begin{aligned} \max_{1 \leq r \leq d, 1 \leq k \leq K} \sup_{f \in \tilde{\mathcal{T}}_{r,k}} \left| \frac{1}{n} \sum_{i=1}^n \left( \frac{\epsilon_i f(x_i)}{\|f\|_{L_2} + \lambda^{\frac{1}{2}}} \right) \right| &\leq \tilde{C}' L \log(dK) \zeta_n \max\{1, \tau\}, \\ \max_{1 \leq r \leq d, 1 \leq k \leq K} \sup_{f, f' \in \tilde{\mathcal{T}}_{r,k}} \left| (P - P_n) \left( \frac{ff'}{\|ff'\|_{L_2} + \lambda^{\frac{1}{2}}} \right) \right| &\leq \tilde{C}' \log(dK) \zeta_n \max\{1, \tau\} \end{aligned}$$

with probability  $1 - \exp(-\tau)$ .

The proof is almost identical to that of Corollary A.13.

Let  $\mathcal{T}'_{r,k} = \{(f_{(r,k)}(x) - f'_{(r,k)}(x)) \prod_{k' \neq k} f_{(r,k')}^{**}(x) \mid f_{(r,k)}, f'_{(r,k)} \in \mathcal{H}_{r,k}, \|f_{(r,k)}\|_{\mathcal{H}_{r,k}} \leq 1, \|f'_{(r,k)}\|_{\mathcal{H}_{r,k}} \leq 1\}$ . Then Lemma A.9 gives the following bound.

**Lemma A.15.** *Under the Complexity Assumption (Assumption 2) and the Infinity-Norm Assumption (Assumption 3), there exists a constant  $C'_s$  depending only on  $s$  and  $c$  such that for all  $\lambda > 0$*

$$\mathbb{E} \left[ \sup_{f \in \mathcal{T}'_{r,k}} \frac{|\frac{1}{n} \sum_{i=1}^n \sigma_i f(x_i)|}{\|f\|_{L_2} + \lambda^{\frac{1}{2}}} \right] \leq C'_s \left( \frac{\lambda^{-\frac{s}{2}}}{\sqrt{n}} \vee \frac{1}{\lambda^{\frac{1}{2}} n^{\frac{1}{1+s}}} \right).$$

Let

$$\zeta'_n = C'_s \left( \frac{\lambda^{-\frac{s}{2}}}{\sqrt{n}} \vee \frac{1}{\lambda^{\frac{1}{2}} n^{\frac{1}{1+s}}} \right) \quad (\text{S-21})$$

where  $C'_s$  is given in Lemma A.15. Note that  $\zeta'_n$  is independent of  $K$  while  $\zeta_n$  depends on it. Then, going through the same argument as Lemmas A.10, A.12 and A.13, we obtain the following lemma.

**Lemma A.16.** *Under the Complexity Assumption (Assumption 2) and the Infinity-Norm Assumption (Assumption 3), there exists a universal constant  $C'$  such that all of the following three inequalities are satisfied more than probability  $1 - \exp(-\tau)$  for all  $\tau > 0$ :*

$$\begin{aligned} \max_{1 \leq r \leq d, 1 \leq k \leq K} \sup_{f \in \mathcal{T}'_{r,k}} \left| (P - P_n) \left( \frac{f^2}{\|f\|_{L_2} + \lambda^{\frac{1}{2}}} \right) \right| &\leq C' \log(dK) \zeta'_n \max\{1, \tau\}, \\ \max_{1 \leq r \leq d, 1 \leq k \leq K} \sup_{f \in \mathcal{T}'_{r,k}} \left| \frac{1}{n} \sum_{i=1}^n \left( \frac{\epsilon_i f(x_i)}{\|f\|_{L_2} + \lambda^{\frac{1}{2}}} \right) \right| &\leq C' L \log(dK) \zeta'_n \max\{1, \tau\}, \\ \max_{1 \leq r \leq d, 1 \leq k \leq K} \sup_{f \in \mathcal{H}_{r,k}, \|f\|_{\mathcal{H}_{r,k}} \leq 1} \left| (P - P_n) \left( \frac{f^2}{\|f\|_{L_2} + \lambda^{\frac{1}{2}}} \right) \right| &\leq C' \log(dK) \zeta'_n \max\{1, \tau\}. \end{aligned}$$

## References

- [1] O. Bousquet. A Bennett concentration inequality and its application to suprema of empirical process. *C. R. Acad. Sci. Paris Ser. I Math.*, 334:495–500, 2002.



- [2] M. Ledoux and M. Talagrand. *Probability in Banach Spaces. Isoperimetry and Processes*. Springer, New York, 1991. MR1102015.
- [3] L. Meier, S. van de Geer, and P. Bühlmann. High-dimensional additive modeling. *The Annals of Statistics*, 37(6B):3779–3821, 2009.
- [4] I. Steinwart and A. Christmann. *Support Vector Machines*. Springer, 2008.
- [5] T. Suzuki and M. Sugiyama. Fast learning rate of multiple kernel learning: trade-off between sparsity and smoothness. *The Annals of Statistics*, 41(3):1381–1405, 2013.
- [6] M. Talagrand. New concentration inequalities in product spaces. *Inventiones Mathematicae*, 126: 505–563, 1996.
- [7] S. van de Geer. *Empirical Processes in M-Estimation*. Cambridge University Press, 2000.
- [8] A. W. van der Vaart and J. A. Wellner. *Weak Convergence and Empirical Processes: With Applications to Statistics*. Springer, New York, 1996.
